# Supplementary material for: Discriminating conodont recording bias: a case study from the Nanzhang-Yuan’an Lagerstätte
Source: PeerJ. 2024 Sep 13;12:e18011. doi: 10.7717/peerj.18011 (PMC11404477; doi:10.7717/peerj.18011)
Supplement: Supplemental Information 1 [file peerj-12-18011-s001.xlsx]

## Sheet: data of this study
Type and length of conodonts
specimen from bedding plane	position	length(um)	preservation status		specimen from residues	position	length(um)	preservation status
0001	S	940	complete		34+0.3-001	M	1215.79	complete
0002	S0	1270	complete		34+0.3-002	M	724.59	complete
0004	S	1550	complete		34+0.3-003-1	S	1109.52	broken
0005	S	1060	complete		34+0.3-003-2	S	1000	broken
0006	P	1390	broken		34+0.3-004	M	506.667	broken
0007	M	830	broken		34+0.3-005	S	740.984	broken
0008	S	1470	complete		34+0.3-006	M	701.449	complete
0010	S	1100	complete		34+0.3-007	S	482.5	complete
0012-1	M	1380	complete		34+0.3-008	S	745.455	broken
0012-2	S	2370	complete		34+0.3-009	P	647.761	complete
0012-3	S	2640	complete		34+0.3-010	S	410.417	broken
0012-4	S	2810	complete		34+0.3-011	S	706.667	broken
0012-5	S	2360	complete		34+0.3-012-1	S	376.087	broken
0012-6	S	1480	complete		34+0.3-012-2	S	423.913	broken
0012-7	S	1860	complete		34+0.3-012-3	S	389.13	broken
0012-8	S	1090	complete		34+0.3-013	S	537.662	complete
0012-9	S	1430	complete		34+0.3-014	S	526.19	complete
0012-10	S	1160	complete		34+0.3-015	S	355.769	broken
0012-11	P	1520	complete		34+0.3-016	S	694.737	broken
0012-12	P	1550	complete		34+0.3-017	P	446.512	broken
0012-13	P	1290	complete		34+0.3-018	M	450.909	broken
0012-14	P	970	complete		34+0.3-019	P	600	complete
0012-15	M	1280	complete		34+0.3-020	P	848.78	broken
0013-1	M	430	complete		34+0.3-021	P	869.767	broken
0013-2	M	240	complete		34+0.3-022	S	760	broken
0013-3	S	750	broken		34+0.3-023	S	539.241	complete
0013-4	S	390	complete		34+0.3-024	P	658.974	complete
0013-5	S	290	complete		34+0.3-025	M	341.176	broken
0013-6	S	360	complete		34+0.3-026	M	625.455	complete
0014A	M	600	complete		34+0.3-027	S	728.889	broken
0014B	S	1290	broken		34+0.3-028	S	728.205	complete
0014C	S	750	broken		34+0.3-029	S	713.636	complete
0015	M	1010	broken		34+0.3-030	P	717.241	complete
0016A	S	710	broken		34+0.3-031	P	836	complete
0016B-1	S	590	complete		34+0.3-032	M	822.222	broken
0016B-2	S	410	broken		34+0.3-033	M	579.104	complete
0017	S	980	complete		34+0.3-034	S	527.027	complete
0018	S	960	broken		34+0.3-035-1	S	938.462	broken
0019A	S	1110	complete		34+0.3-035-2	S	882.051	broken
0019B	S	740	complete		34+0.3-036	M	468.235	broken
0021-1	S	1160	broken		34+0.3-037	P	700	broken
0021-2	S	1440	complete		34+0.3-038	M	569.412	broken
0022	S	870	broken		34+0.3-039	M	866.667	complete
0023	S	1190	complete		34+0.3-040	P	958.333	broken
0024	S	580	broken		34+0.3-041	P	750	complete
0025	M	1600	complete		34+0.3-042	P	1046.24	complete
0027	S	1030	complete		34+0.3-043	S	559.036	complete
0028	S	1020	complete		34+0.3-044	P	686.792	broken
0030-1	P	650	complete		34+0.3-045	S	454.545	broken
0030-2	P	650	complete		I-34+0.3-001	M	638.095	complete
0030-3	P	750	complete		I-34+0.3-002	P	1226.67	complete
0030-4	S	940	complete		I-34+0.3-003	P	727.869	broken
0030-5	S	870	complete		I-34+0.3-004	S	730.909	complete
0030-6	S	1290	complete		I-34+0.3-005	M	660	complete
0030-7	S	1200	complete		I-34+0.3-006	S	1021.98	broken
0030-8	S	590	complete		I-34+0.3-007	S	737.705	broken
0030-9	S	1680	complete		I-34+0.3-008	M	569.231	complete
0030-10	S	840	complete		I-34+0.3-009	P	506.122	broken
0031	S	720	broken		I-34+0.3-010	P	589.041	broken
0032	S	950	complete		I-34+0.3-011	S	414.894	broken
0033-1	S	1390	complete		I-34+0.3-012	S	592	complete
0033-2	S	1310	complete		I-34-0.3-001	S	547.368	complete
0034	S	1170	complete		I-34-0.3-002	S	1373.24	complete
0035	P	460	broken		I-34-0.3-003	M	1345.07	complete
0036	S	820	complete		I-34-0.3-004	S	492.958	broken
0037	P	450	complete		I-34-0.3-005	M	489.744	complete
0038	S	1310	complete		I-34-0.3-006	S	868.966	broken
0039	S	730	broken		I-34-0.3-007	S	762.712	broken
0040-1	M	360	complete		I-34-0.3-008	S	895.455	broken
0040-2	S	620	complete		I-34-0.3-009	S	650.888	broken
0040-3	S	710	complete		I-34-0.3-010	S	945.055	broken
0040-4	S	610	complete
0041	P	790	broken
0042-A	S	710	broken
0042-B	S	690	complete
0043-1	S	950	complete
0043-2	S	1010	complete
0043-3	M	630	complete
0043-4	P	600	complete
0043-5	P	460	complete
0043-6	S	640	complete
0043-7	S	750	complete
0043-8	S	920	complete
0043-9	S	760	complete
0044	S	990	complete
0045-1	M	820	complete
0045-2	S	730	complete
0045-3	S	900	complete
0045-4	S	710	complete
0045-5	S	1290	complete
0045-6	S	1050	complete
0047-1	S	1080	complete
0047-2	S	1250	complete
0048	S	600	broken
0049	S	810	broken
0050-B	S	710	complete
0051-1	P	670	complete
0051-2	P	610	complete
0051-3	P	690	complete
0052-1	S	990	complete
0052-2	S	1000	complete
0053-1	P	510	complete
0053-2	P	640	complete
0053-3	S	670	complete
0053-4	S	870	complete
0053-5	S	990	complete
0053-6	S	790	complete
0053-7	M	940	complete
0053-8	S	730	complete
0055-A	S	1420	broken
0055-B	S	980	broken
0055-C	S	1370	broken
0055-D-1	S	960	broken
0055-D-2	P	720	broken
0055-D-3	S	540	broken
0055-D-4	S	570	broken
0055-D-5	S	710	broken
0056-1	S	510	complete
0056-2	S	860	complete
0056-3	S	940	complete
0056-4	S	630	complete
0057-1	P	1080	complete
0057-2	P	1240	complete
0057-3	P	1180	complete
0057-4	P	1150	complete
0057-5	S	1690	complete
0057-6	S	1750	complete
0057-7	M	750	complete
0057-8	S	1360	complete
0057-9	S	1680	complete
0057-10	S	1710	complete
0057-11	M	780	complete
0058-1	M	650	broken
0058-2	S	850	broken
0058-3	S	350	broken
0058-4	S	520	broken
0059-A	S	1280	complete
0059-B	S	980	complete
0059-C	P	880	complete
0060-1	M	440	broken
0060-2	S	600	broken
0061	S	1090	complete
0062	M	850	complete
0063	S	1420	complete
0064	S	1310	complete
0065	S	1360	complete
0066	S	1670	complete
0067-1	M	500	broken
0067-2	S	710	broken
0068	S	1050	complete
0069-A	M	470	complete
0069-B-1	S	920	complete
0069-B-2	S	940	complete
0070	S	900	complete
0071	P	810	complete
0072-1	S	420	broken
0072-2	S	390	broken
0072-3	S	380	broken
0073-1	S	770	complete
0073-2	S	520	complete
0074	S	820	complete
0075	S	550	broken
0076-1	S	380	broken
0076-2	M	520	complete
0076-3	S	640	complete
0077	M	610	broken
0078	S	940	broken

## Sheet: data of Koke, 2017
	P				S							M
Hadrodontina aequabilis	P1		P2		S0	S1		S2		S3/4		M
	S	D	S	D		S	D	S	D	S	D	S	D
lev.1612a	59	80	100	96	298	94	94	111	114	314	307	239	214
total of lev.1612a	335				1332							453
ratio of llev.1612a	0.739514				2.9404							1
103A	61	65	62	63	237	56	55	84	87	218	238	203	197
total of 103A	251				975							400
ratio of 103A	0.6275				2.4375							1
1NK	28	35	30	14	77	11	17	30	33	58	52	61	41
total of 1NK	107				278							102
ratio of 1NK	1.04902				2.72549							1
total	148	180	192	173	612	161	166	225	234	590	597	503	452
total	328		365		612	327		459		1187		955
total	693				2585							955
ratio of total	0.725654				2.70681							1
	P				S							M
Ellisonia triassica	P1		P2		S0	S1		S2		S3/4		M
	S	D	S	D		S	D	S	D	S	D	S	D
sample1	6	4	5	11	9	4	4	5	8	23	16	8	10
total	10		16		9	8		13		39		18
total	26				69							18
ratio	1.44444				3.83333							1
	P				S							M
Cornudina breviramulis	P1		P2		S0	S1		S2		S3/4		M
	S	D	S	D		S	D	S	D	S	D	S	D
sample1	26	23	35	43	52	36	22	68	81	209	150	41	55
total	49		78		52	58		149		359		96
total	127				618							96
ratio	1.32292				6.4375							1
	P				S							M
Staeschegnathus perrii	P1		P2		S0	S1		S2		S3/4		M
	S	D	S	D		S	D	S	D	S	D	S	D
1601	16	24	8	17	23	12	22	31	23	70	85	26	30
total of 1601	65				266							56
ratio of 1601	1.16071				4.75							1
12.7-12.9m	42	30	18	30	48	23	26	47	52	106	121	30	31
total of 12.7-12.9m	120				453							61
ratio of 12.7-12.9m	1.96721				7.42623							1
	P				S							M
Furnishius triserratus	P1		P2		S0	S1		S2		S3/4		M
	S	D	S	D		S	D	S	D	S	D	S	D
sample1	14	15	4	3	4	10	3	3	2	20	22	5	17
total	29		7		4	13		5		42		22
total	36				64							22
ratio	1.63636				2.90909							1
